# Supplementary material for: An effect of the substituent position and metal type on the electropolymerization properties of chalcone substituted metallophthalocyanines
Source: Royal Society of Chemistry journal article supplement (doi:10.1039/c5dt03789a), 2015-01-01
Supplement: c5dt03789a1.pdf [file c5dt03789a1.pdf]

# **Effect of substituent position and metal type on the electropolymerization properties of chalcone substituted metallophthalocyanines**

**Dilek Çakır<sup>a</sup>, Tayfun Arslan<sup>b</sup>, Zekeriya Biyiklioglu<sup>a\*</sup>**

*<sup>a</sup>Department of Chemistry, Faculty of Science, Karadeniz Technical University, 61080, Trabzon-Turkey*

*<sup>b</sup>Department of Textile, Technical Sciences Vocational School, Giresun University, Giresun, Turkey*

## ***1.1. Materials***

(2E)-3-[4-(Dimethylamino)phenyl]-1-(4-hydroxyphenyl)prop-2-en-1-one **1**,<sup>1</sup> 4-nitrophthalonitrile **2**<sup>2</sup> and 3-nitrophthalonitrile **3**<sup>3</sup> were prepared according to the literature. All reagents and solvents were of reagent grade quality and were obtained from commercial suppliers. All solvents were dried and purified as described by Perrin and Armarego.<sup>4</sup>

### ***1.2. Equipment***

The IR spectra were recorded on a Perkin Elmer 1600 FT-IR spectrophotometer, using KBr pellets. <sup>1</sup>H and <sup>13</sup>C-NMR spectra were recorded on a Bruker Avance III 400 MHz spectrometers in CDCl<sub>3</sub> and chemical shifts were reported (δ) relative to Me<sub>4</sub>Si as internal standard. Mass spectra were measured on a Micromass Quatro LC/ULTIMA LC-MS/MS spectrometer. MALDI-MS of complexes were obtained in dihydroxybenzoic acid as the MALDI matrix, using a nitrogen laser accumulating 50 laser shots, with a Bruker Microflex LT MALDI-TOF mass spectrometer. Optical spectra in the UV-vis region were recorded with a Perkin Elmer Lambda 25 spectrophotometer. Melting points were measured on an electrothermal apparatus and are uncorrected.

### ***1.3. Electrochemical measurements***

The cyclic voltammetry (CV) and square wave voltammetry (SWV) measurements were carried out with Gamry Interface 1000 potentiostat/galvanostat controlled by an external Pc and utilizing a three-electrode configuration at 25°C. The working electrode was a Pt disc with a surface area of 0.071 cm<sup>2</sup>. A Pt wire served as the counter electrode. Saturated

calomel electrode (SCE) was employed as the reference electrode and separated from the bulk of the solution by a double bridge. Electrochemical grade TBAP in extra pure DCM was employed as the supporting electrolyte at a concentration of  $0.10 \text{ mol dm}^{-3}$ .

## References

- [1] M. Ono, R. Watanabe, H. Kawashima, Y. Cheng, H. Kimura, H. Watanabe, M. Haratake, H. Saji, M. Nakayama, *J. Med. Chem.*, 2009, **52**, 6394-6401.
- [2] J.G. Young, W. Onyebuagu, *J. Org. Chem.*, 1990, **55**, 2155-2159.
- [3] R. D. George, A. W. Snow, *J. Heterocycl. Chem.*, 1995, **32**, 495-498.
- [4] D.D. Perrin, W.L.F. Armarego, *Purification of Laboratory Chemicals (2nd edn)*, Pergamon Press: Oxford, (1989).

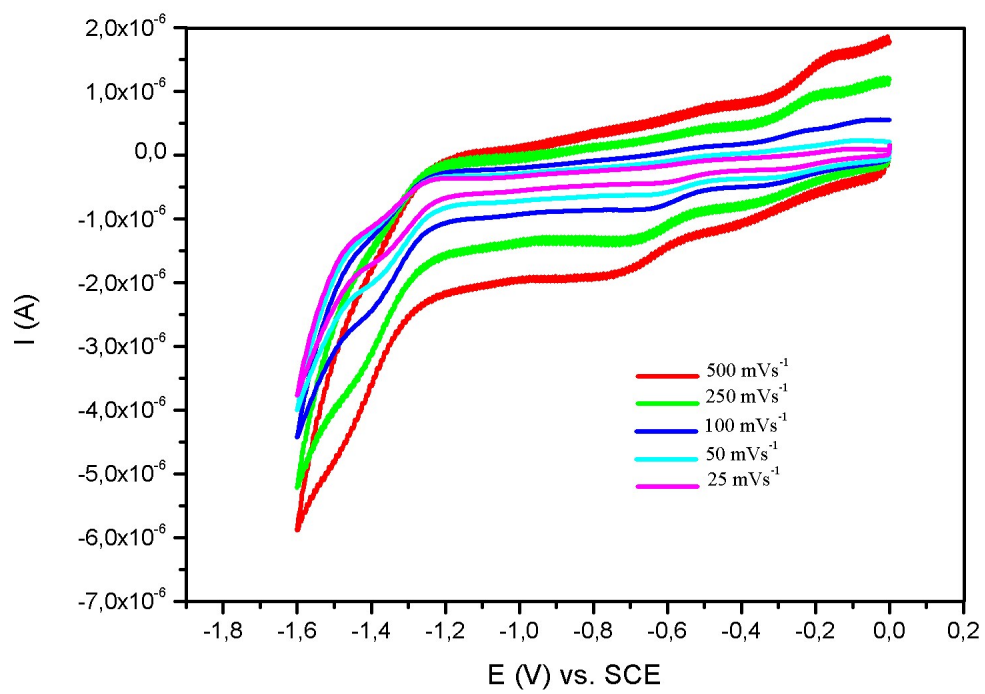

Figure S1. CVs of CoPc (**6**) recorded at various scan rates on a Pt working electrode in DCM/TBAP

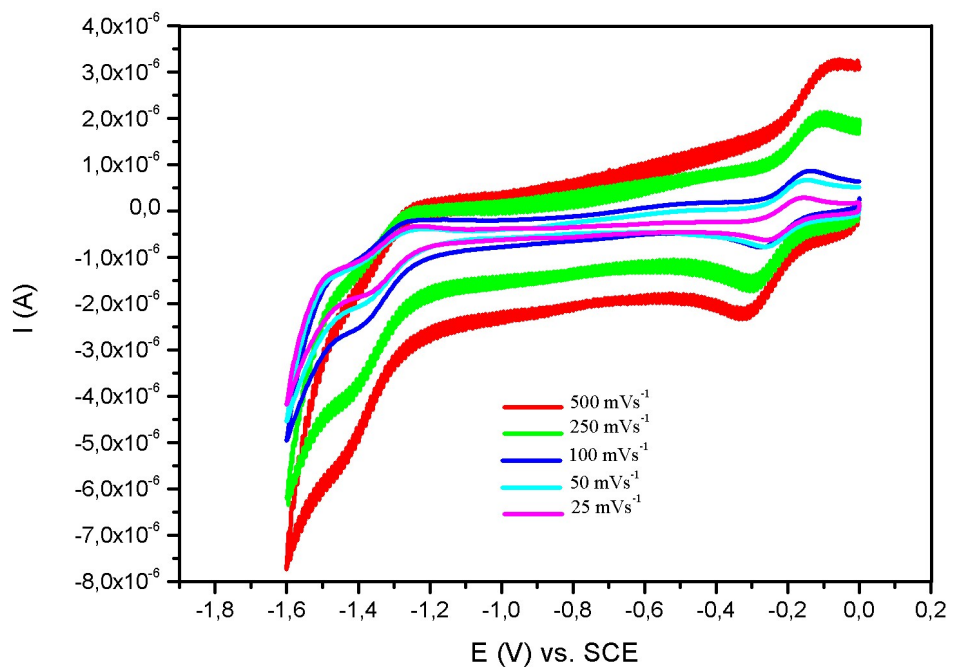

Figure S2. CVs of CoPc (7) recorded at various scan rates on a Pt working electrode in DCM/TBAP

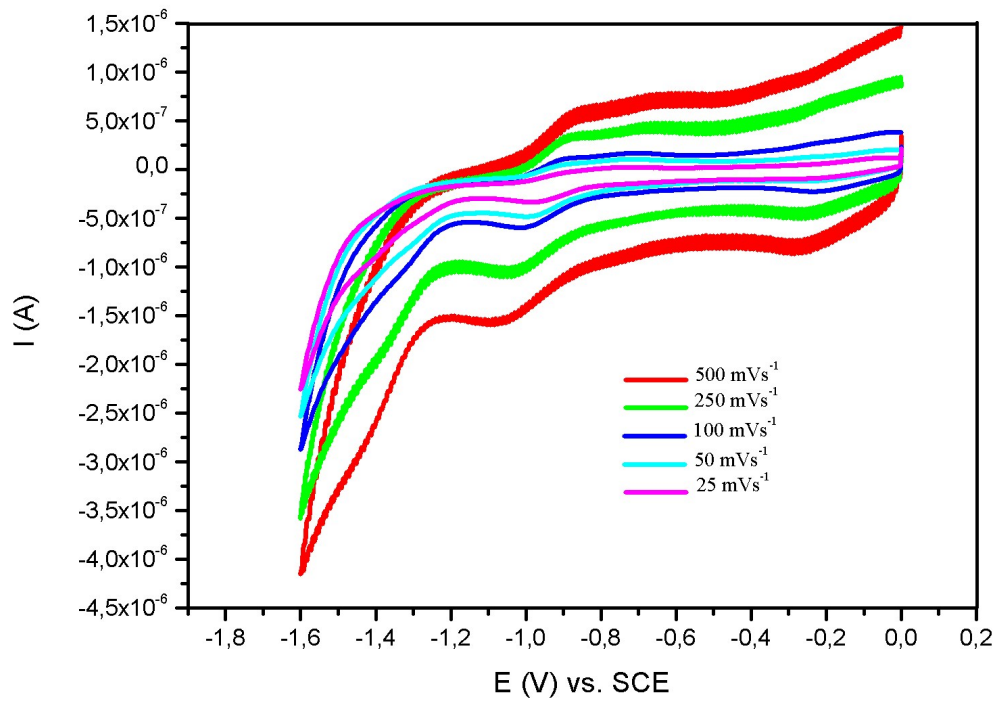

Figure S3. CVs of MnPc (**8**) recorded at various scan rates on a Pt working electrode in DCM/TBAP

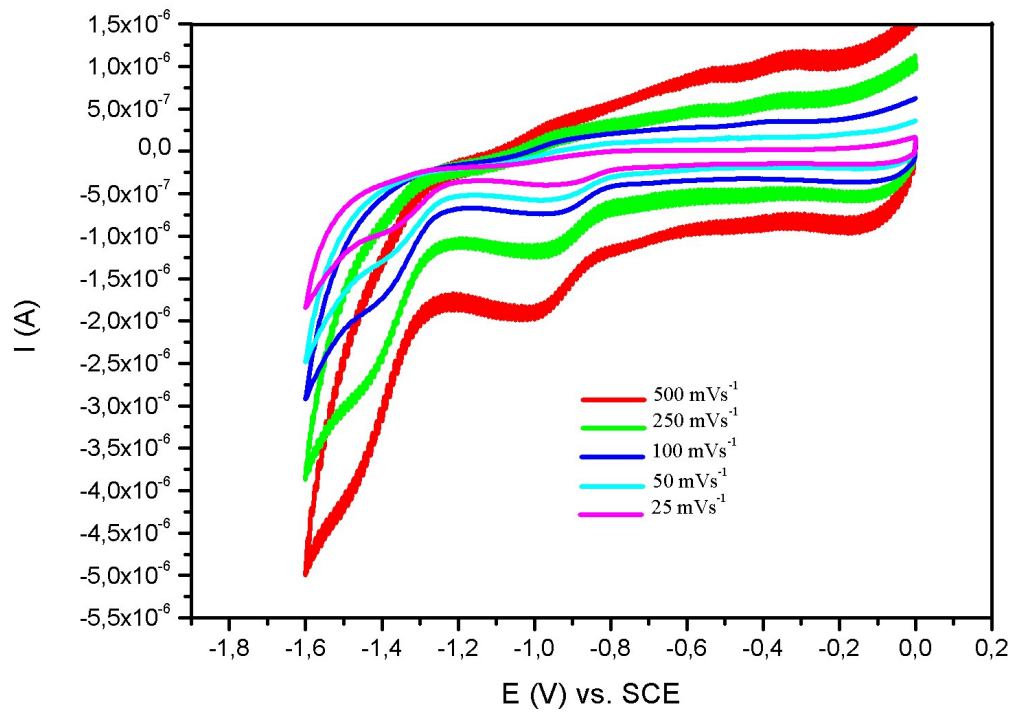

Figure S4. CVs of MnPc (**9**) recorded at various scan rates on a Pt working electrode in DCM/TBAP
